# Supplementary material
Source: publisher figshare collection journal article supplement (https://acs.figshare.com/ndownloader/files/10077828)
Supplement: Supplementary file 1 [file 10077828]

**Neuroprotective effects of 1,2-diarylpropane type phenylpropanoid  
enantiomers from red raspberry against H<sub>2</sub>O<sub>2</sub>-induced  
oxidative stress in human neuroblastoma SH-SY5Y cells**

Le Zhou<sup>†,‡</sup>, Guo-Dong Yao<sup>†,‡</sup>, Xiao-Yu Song<sup>†</sup>, Jie Wang<sup>†</sup>, Bin Lin<sup>‡</sup>, Xiao-Bo Wang<sup>§</sup>,  
Xiao-Xiao Huang<sup>†,§,\*</sup>, Shao-Jiang Song<sup>†,\*</sup>

<sup>†</sup> *School of Traditional Chinese Materia Medica, Key Laboratory of Structure-Based  
Drug Design and Discovery, Ministry of Education, Shenyang Pharmaceutical  
University, Shenyang 110016, People's Republic of China*

<sup>‡</sup> *School of Pharmaceutical Engineering, Shenyang Pharmaceutical University,  
Shenyang 110016, People's Republic of China*

<sup>§</sup> *Chinese People's Liberation Army 210 Hospital, Dalian 116021, People's Republic  
of China*

\*Corresponding author. Tel: +86 24 23986510 (S.-J. Song).

E-mail addresses: songsj99@163.com. (S.-J. Song), xiaoxiao270@163.com (X.-X.  
Huang).

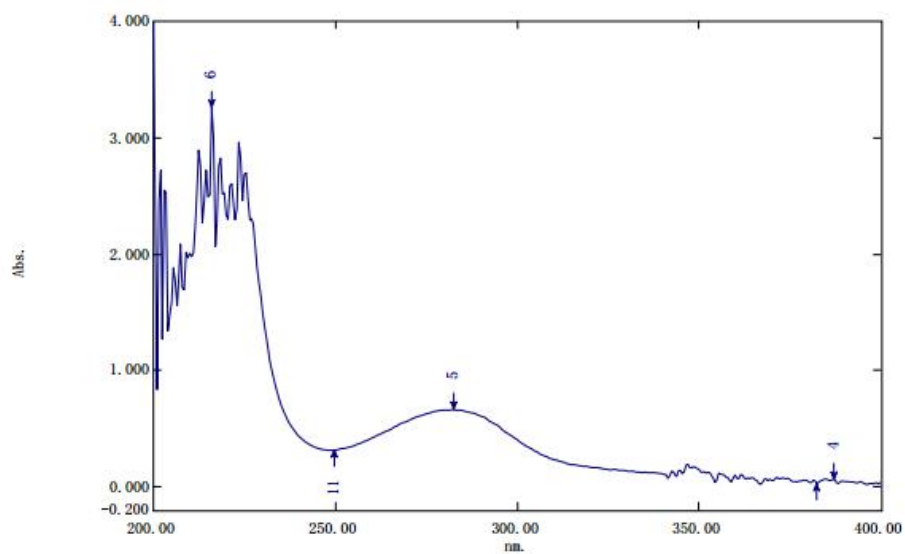

测定属性  
 波长范围 (nm.): 200.00到500.00  
 扫描速度: 高速  
 采样间隔: 0.5  
 自动采样间隔: 停用  
 扫描模式: 单一的

试样准备属性  
 重量:

0.1mg  
 体积: 10ml  
 稀释:  
 光程长: 200-400  
 附加信息:

| No. | P/V | Wavelength | Abs.  | 描述 |
|-----|-----|------------|-------|----|
| 1   | ●   | 483.00     | .025  |    |
| 2   | ●   | 469.00     | .026  |    |
| 3   | ●   | 421.00     | .035  |    |
| 4   | ●   | 387.00     | .065  |    |
| 5   | ●   | 282.50     | .664  |    |
| 6   | ●   | 216.00     | 3.257 |    |
| 7   | ●   | 473.50     | .020  |    |
| 8   | ●   | 447.00     | .019  |    |
| 9   | ●   | 415.00     | .022  |    |
| 10  | ●   | 382.50     | .028  |    |
| 11  | ●   | 249.50     | .314  |    |

Figure S1.1 UV spectrum of compound 1

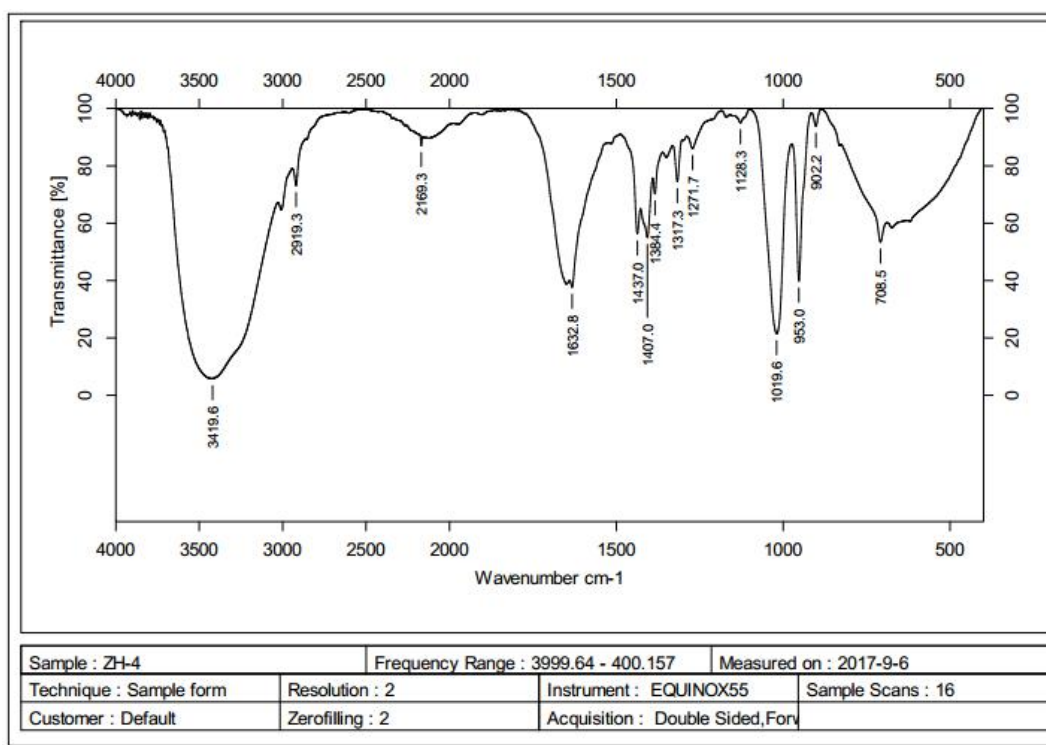

Figure S1.2 IR spectrum of compound 1

## Mass Spectrum Molecular Formula Report

### Analysis Info

Analysis Name D:\Data\20151015CEYANG\ZH-4\_1-C,5\_01\_5807.d  
 Method 20151019yezhi.m  
 Sample Name ZH-4  
 Comment

Acquisition Date 10/21/2015 11:15:17 AM

Instrument / Ser# Bruker Customer  
 Operator micrOTOF-Q 125

### Acquisition Parameter

|             |          |                       |           |                  |           |
|-------------|----------|-----------------------|-----------|------------------|-----------|
| Source Type | ESI      | Ion Polarity          | Positive  | Set Nebulizer    | 1.2 Bar   |
| Focus       | Active   | Set Capillary         | 4500 V    | Set Dry Heater   | 180 °C    |
| Scan Begin  | 50 m/z   | Set End Plate Offset  | -500 V    | Set Dry Gas      | 8.0 l/min |
| Scan End    | 3000 m/z | Set Collision Cell RF | 400.0 Vpp | Set Divert Valve | Source    |

### Generate Molecular Formula Parameter

|                  |                        |         |
|------------------|------------------------|---------|
| Formula, min.    |                        |         |
| Formula, max.    |                        |         |
| Measured m/z     | Tolerance              | Charge  |
| Check Valence    | Minimum                | Maximum |
| Nitrogen Rule    | Electron Configuration |         |
| Filter H/C Ratio | Minimum                | Maximum |
| Estimate Carbon  |                        |         |

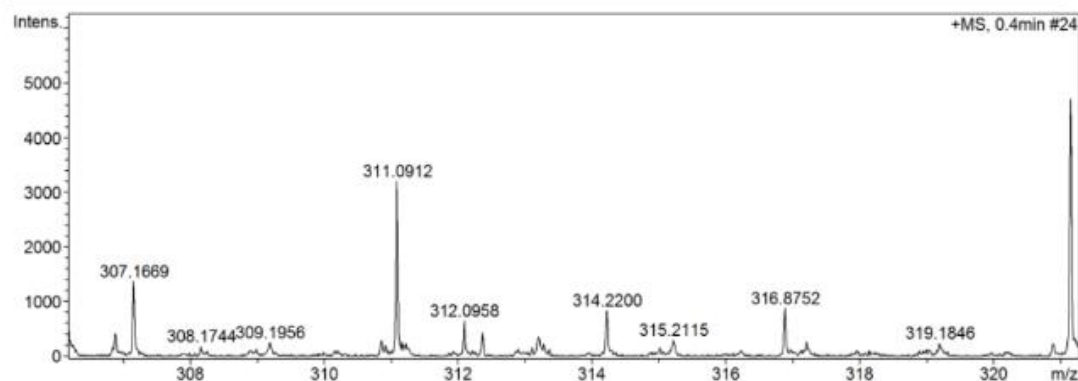

Figure S1.3 HRESIMS spectrum of compound 1

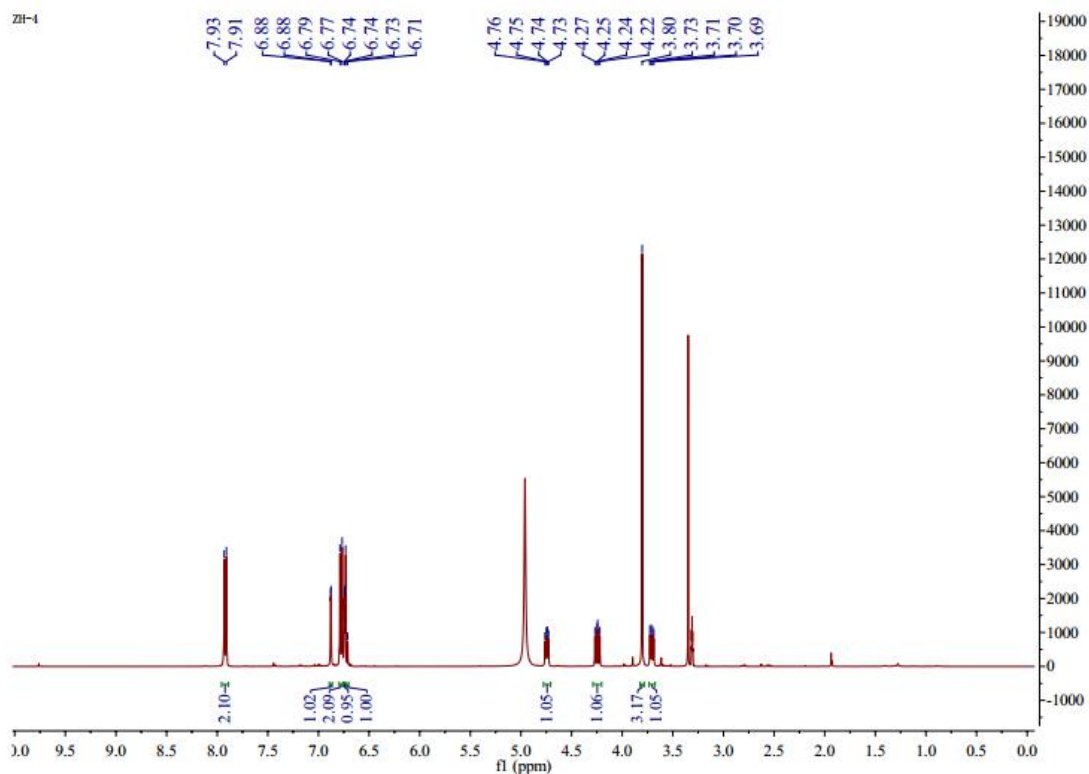

Figure S1.4 <sup>1</sup>H NMR spectrum (400 MHz, CD<sub>3</sub>OD) of compound 1

36

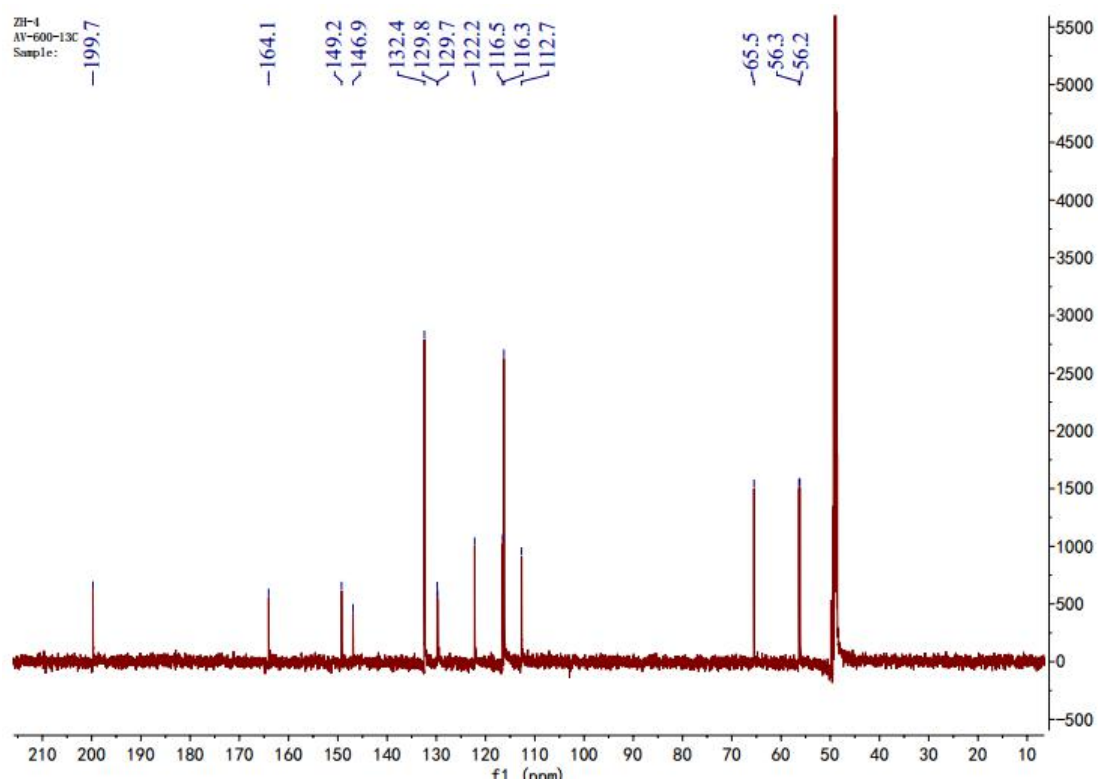

**Figure S1.5**  $^{13}\text{C}$  NMR spectrum (100 MHz,  $\text{CD}_3\text{OD}$ ) of compound **1**

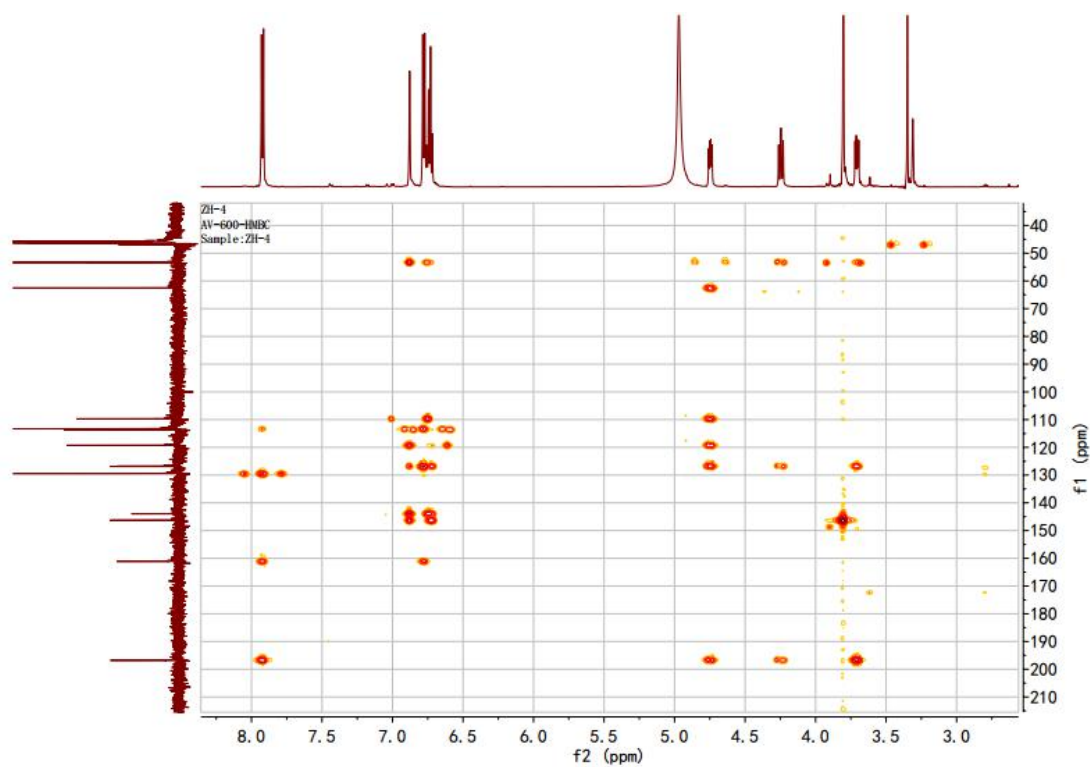

**Figure S1.6** HMBC spectrum (600 MHz,  $\text{CD}_3\text{OD}$ ) of compound **1**

44

45

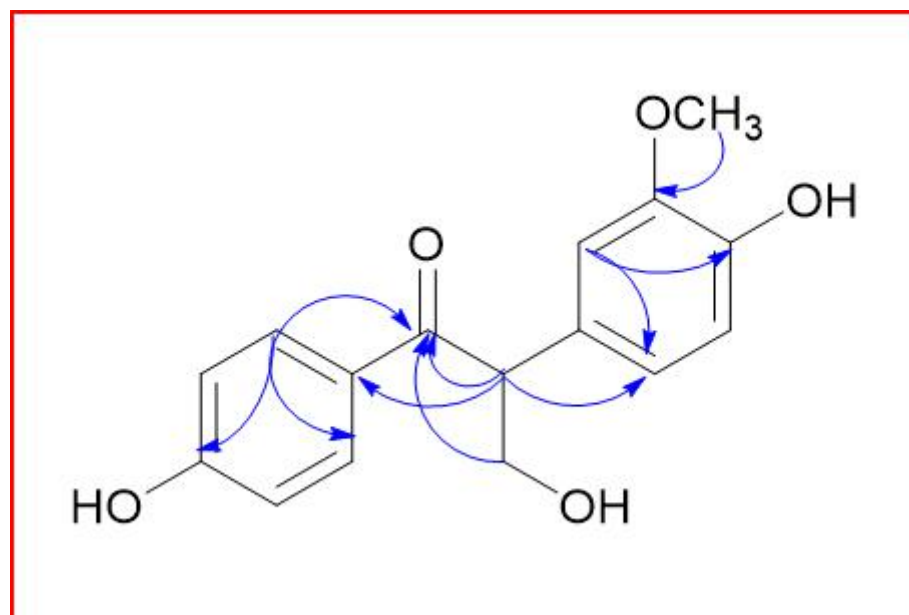

46

47

48 **Figure S1.7** Key HMBC correlations of compound **1**.

49

50

51

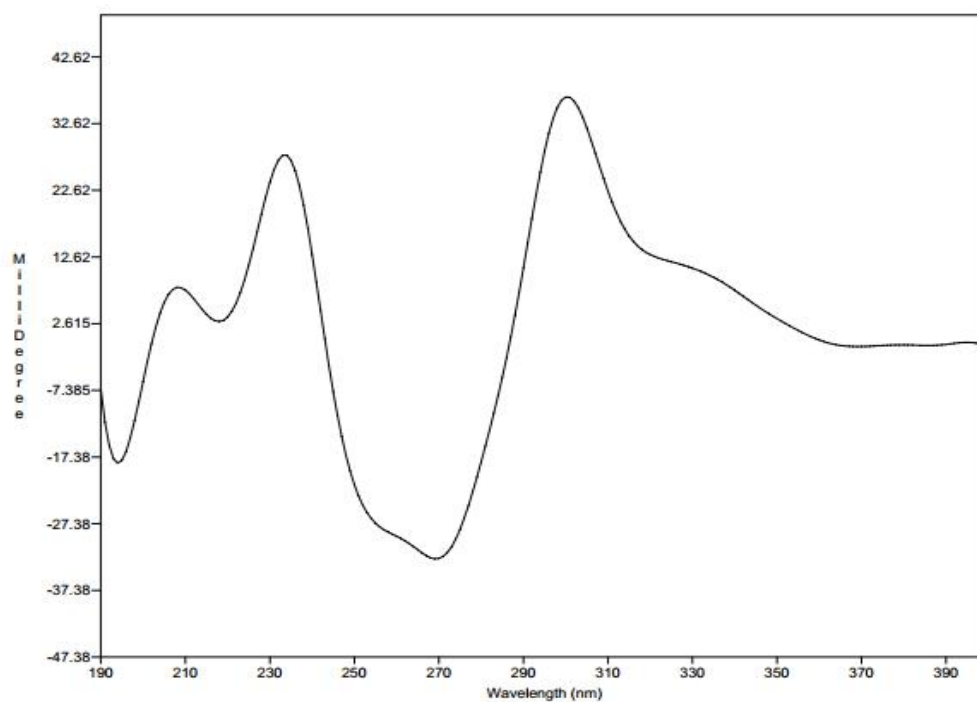

52

53 **Figure S1.8** Experimental ECD spectra of **1a**

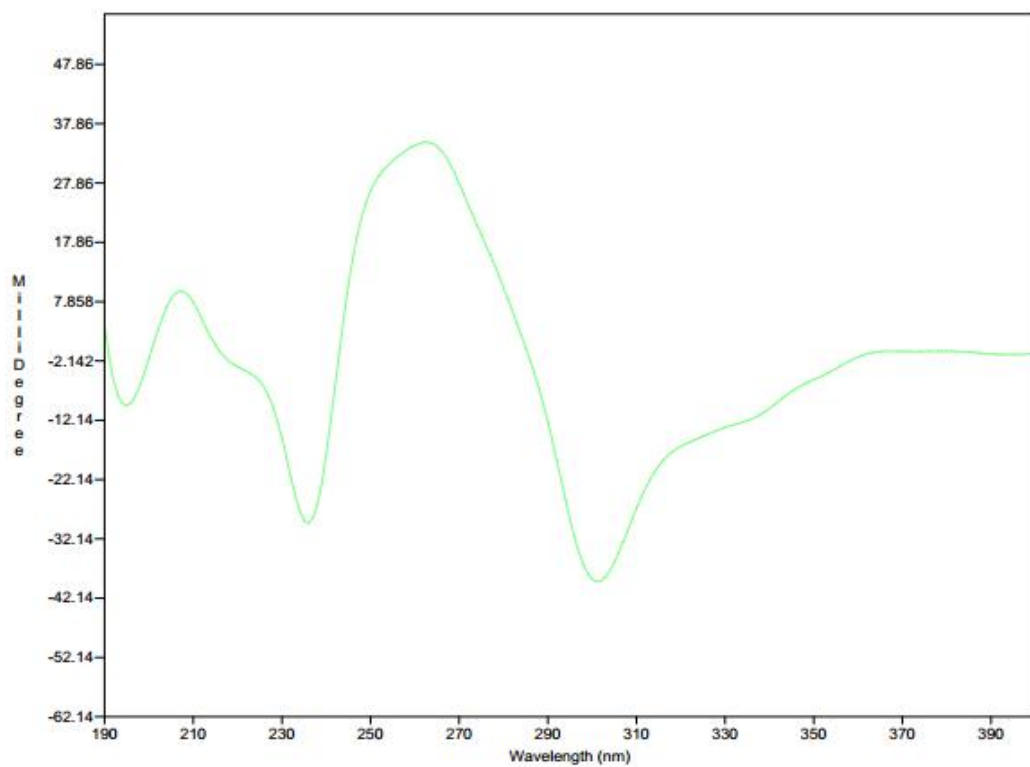

**Figure S1.9** Experimental ECD spectra of **1b**

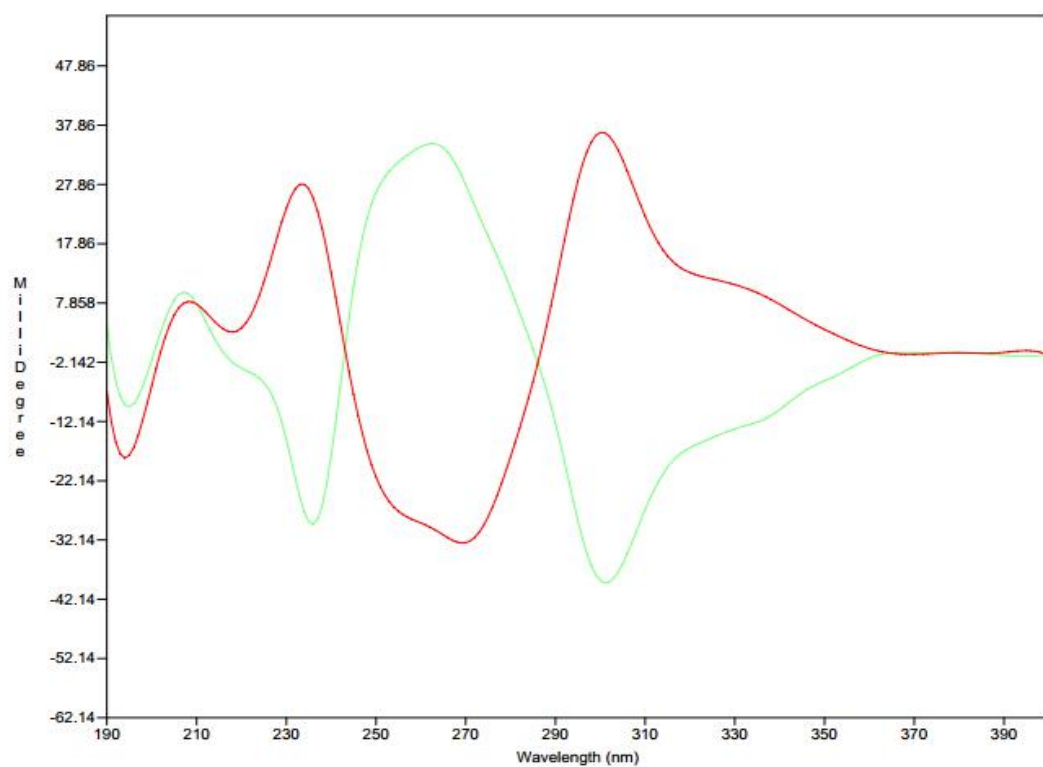

**Figure S1.10** Experimental ECD spectra of **1a/1b**

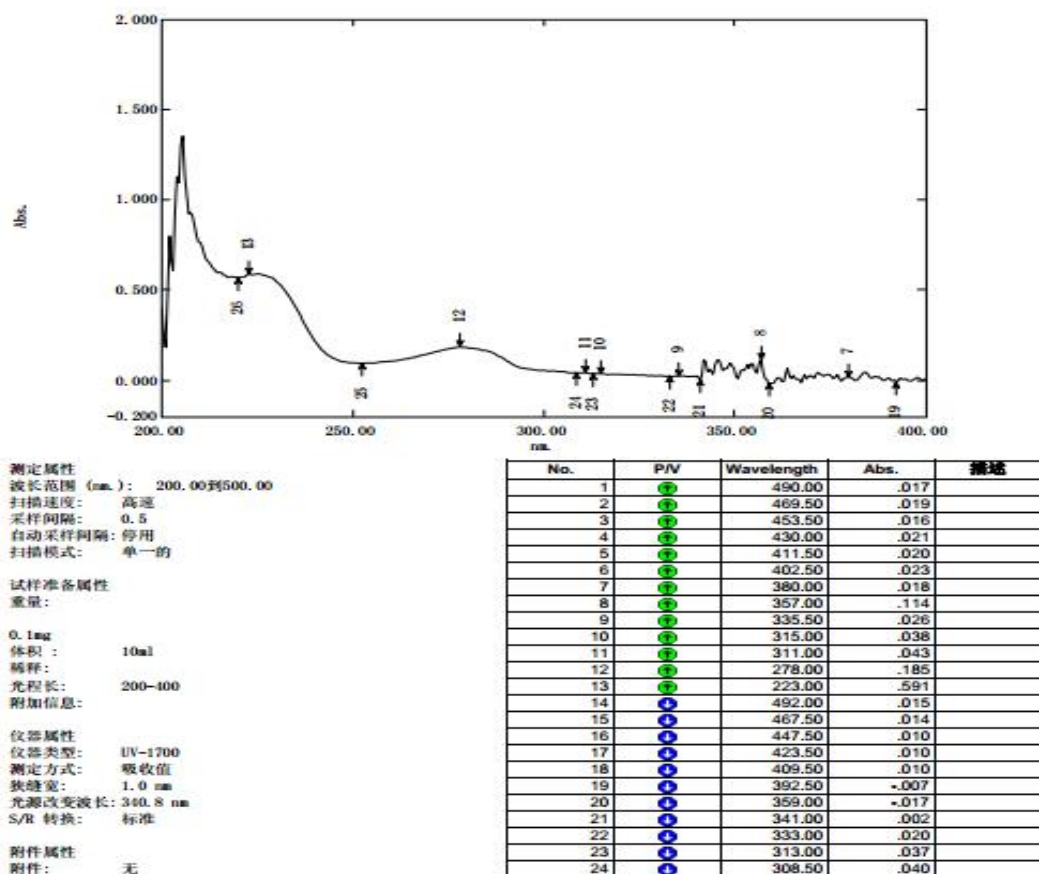

Figure S2.1 UV spectrum of compound 2

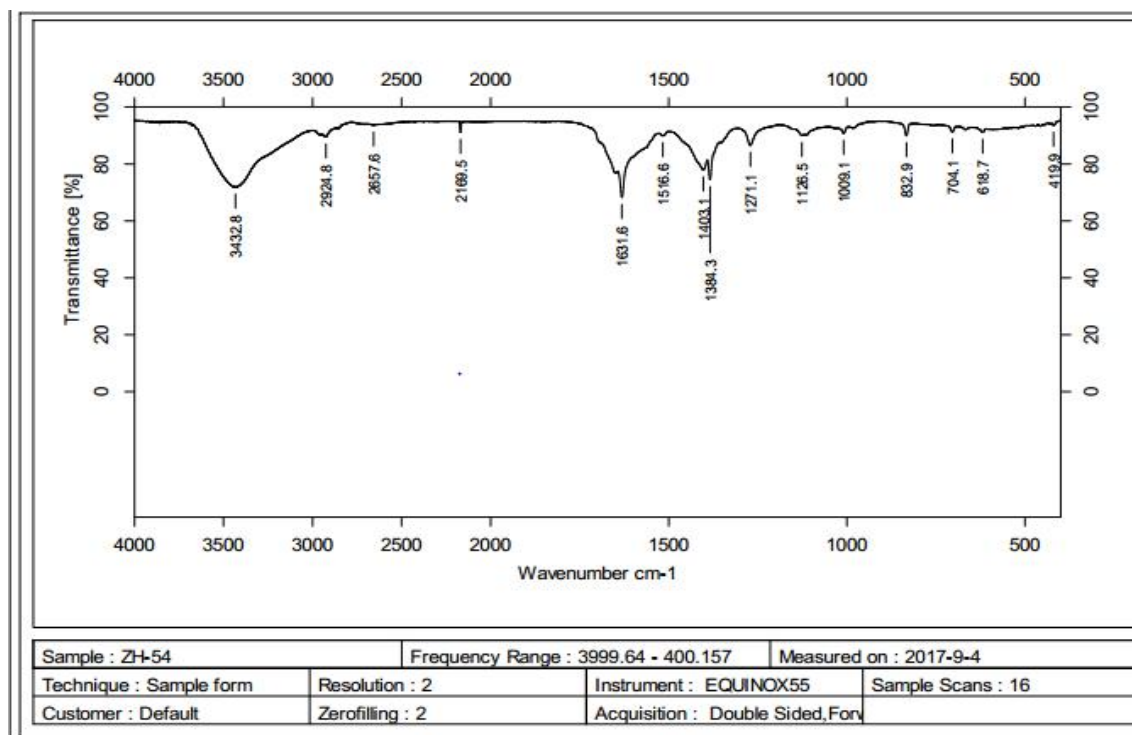

Figure S2.2 IR spectrum of compound 2



## Mass Spectrum Molecular Formula Report

### Analysis Info

Analysis Name D:\Data\20160331CEYANG\ZH-54\_1-A,2\_01\_6921.d  
 Method 20131026\_ceyang.m  
 Sample Name ZH-54  
 Comment

Acquisition Date 3/31/2016 2:57:07 PM

Instrument / Ser# Bruker Customer  
 Operator micrOTOF-Q 125

### Acquisition Parameter

|             |          |                       |           |                  |           |
|-------------|----------|-----------------------|-----------|------------------|-----------|
| Source Type | ESI      | Ion Polarity          | Positive  | Set Nebulizer    | 1.2 Bar   |
| Focus       | Active   | Set Capillary         | 4500 V    | Set Dry Heater   | 180 °C    |
| Scan Begin  | 50 m/z   | Set End Plate Offset  | -500 V    | Set Dry Gas      | 8.0 l/min |
| Scan End    | 3000 m/z | Set Collision Cell RF | 400.0 Vpp | Set Divert Valve | Source    |

### Generate Molecular Formula Parameter

|                  |                        |         |
|------------------|------------------------|---------|
| Formula, min.    |                        |         |
| Formula, max.    |                        |         |
| Measured m/z     |                        |         |
| Check Valence    | Tolerance              | Charge  |
| Nitrogen Rule    | Minimum                | Maximum |
| Filter H/C Ratio | Electron Configuration |         |
| Estimate Carbon  | Minimum                | Maximum |

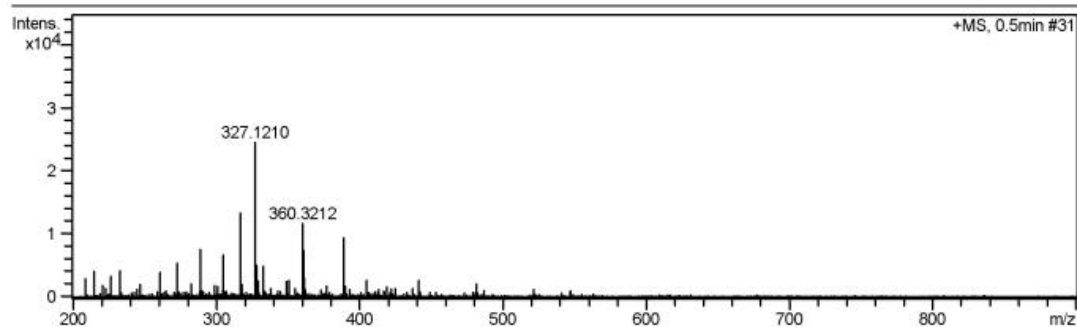

Figure S2.3 HRESIMS spectrum of compound 2

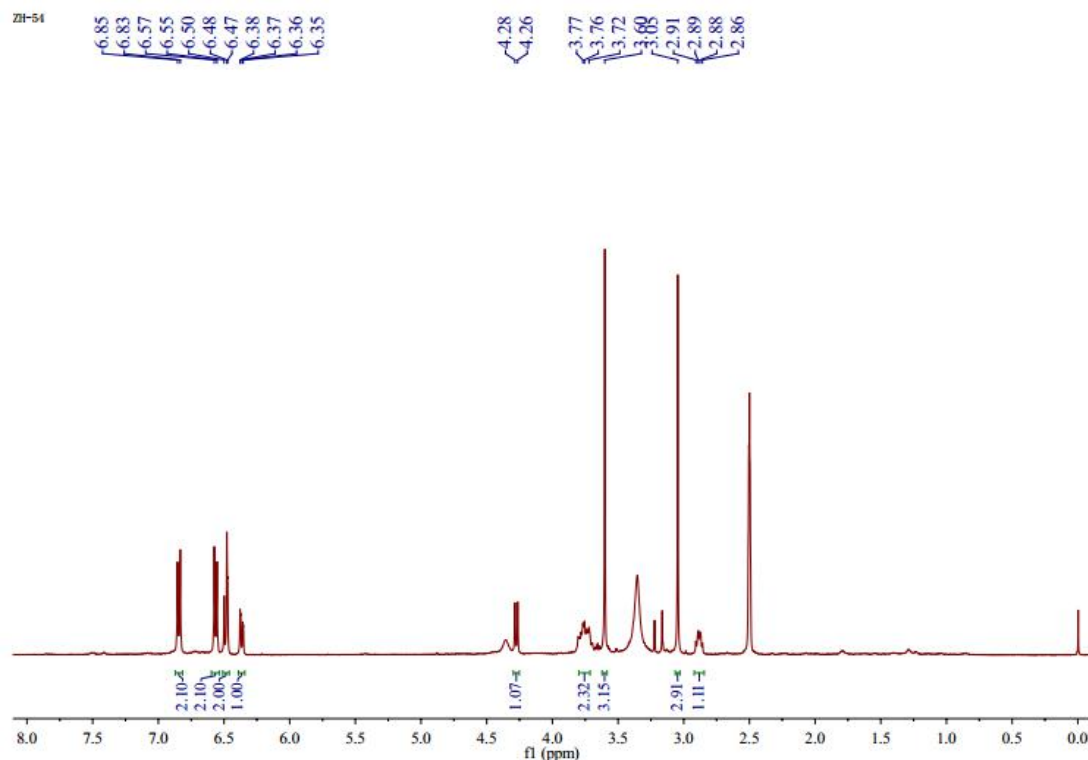

Figure S2.4  $^1\text{H}$  NMR spectrum (400 MHz,  $\text{DMSO}-d_6$ ) of compound 2



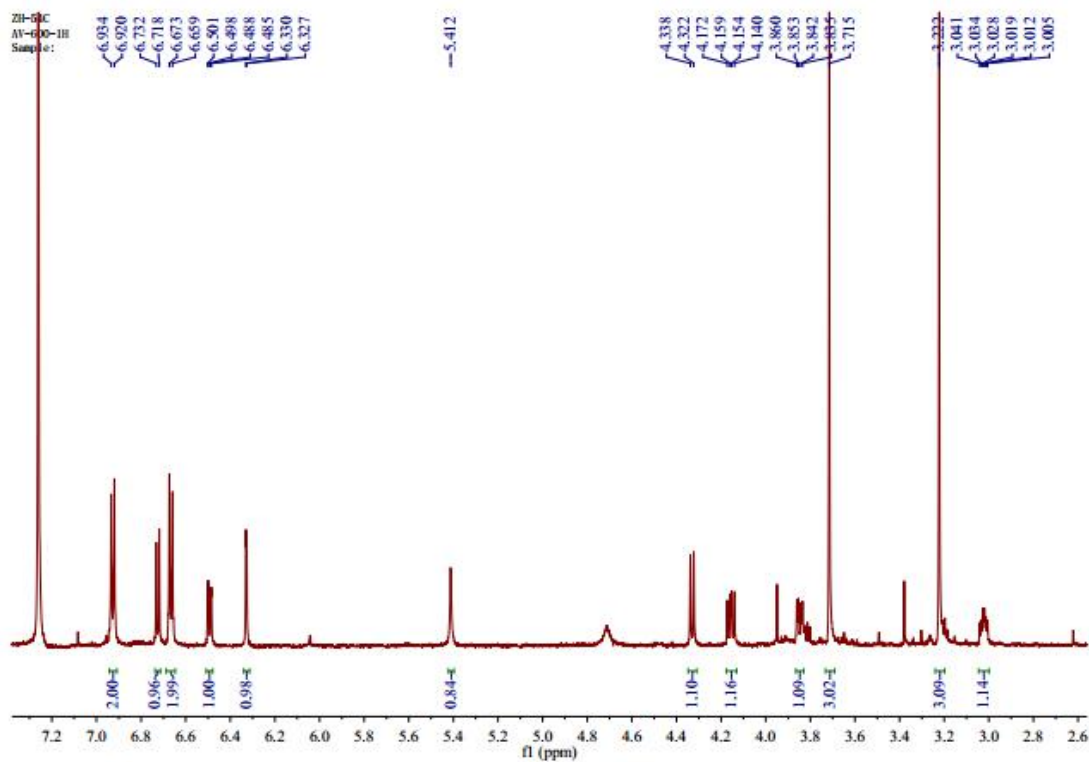

**Figure S2.5**  $^1\text{H}$  NMR spectrum (600 MHz,  $\text{CDCl}_3$ ) of compound **2**

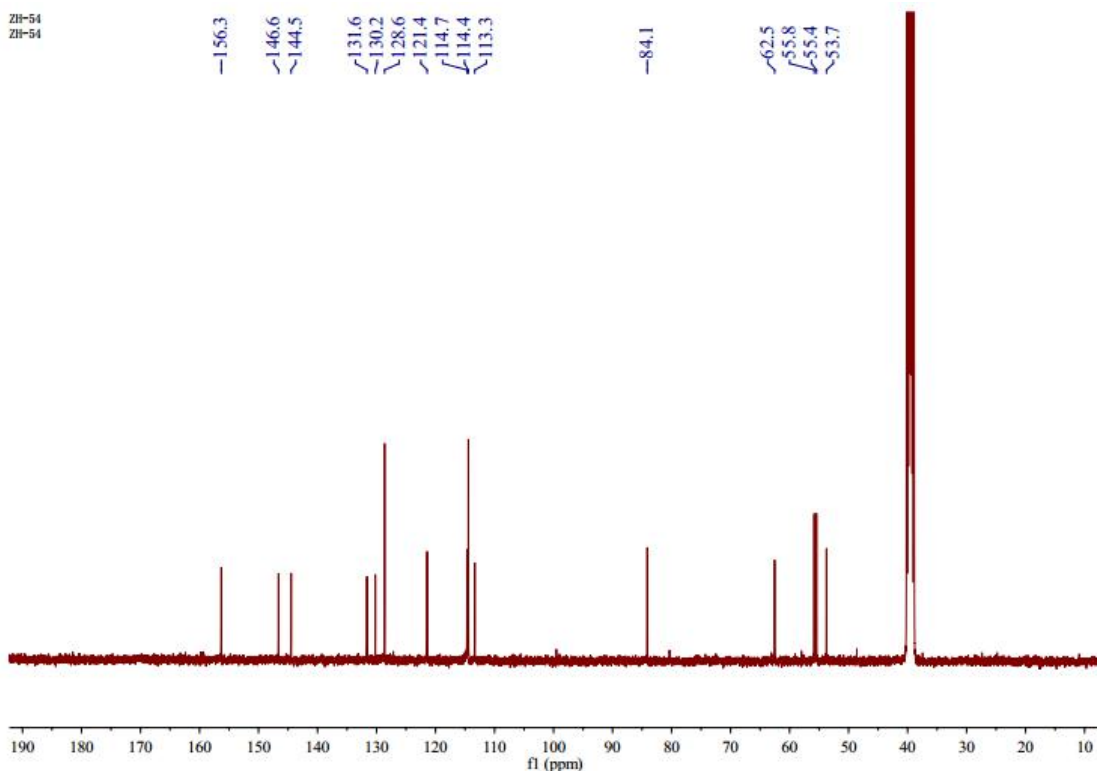

**Figure S2.6**  $^{13}\text{C}$  NMR spectrum (100 MHz,  $\text{DMSO}-d_6$ ) of compound **2**

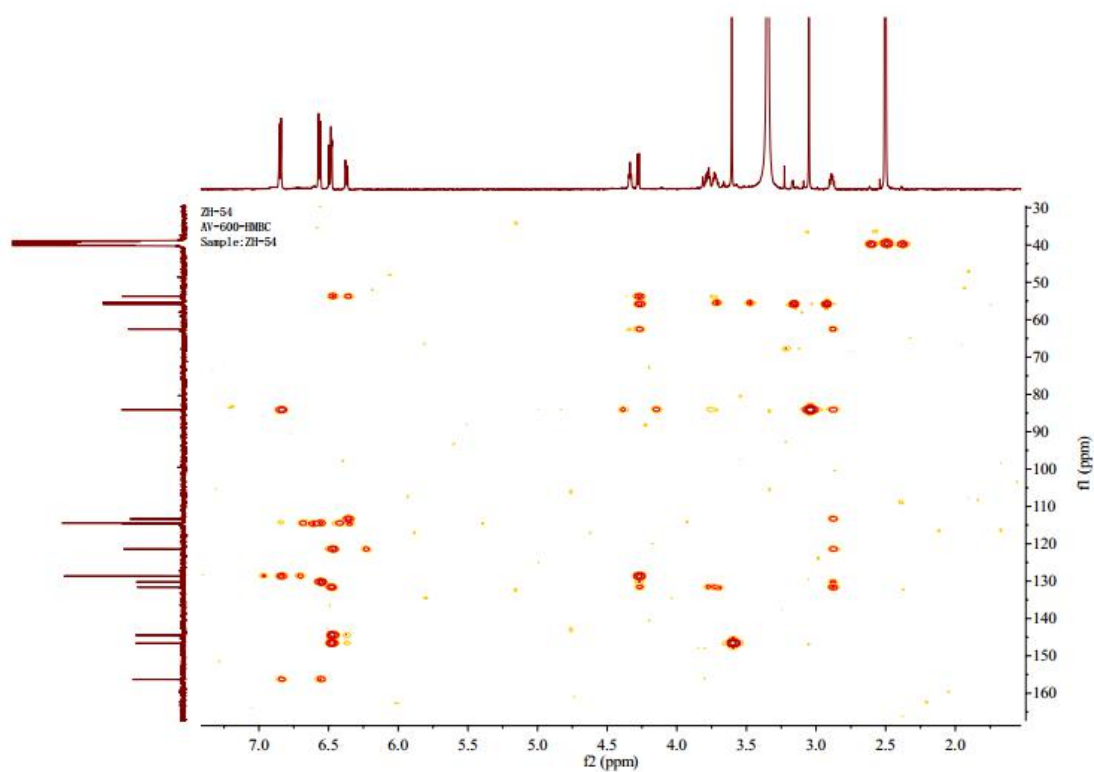

**Figure S2.7** HMBC spectrum (600 MHz, DMSO- $d_6$ ) of compound **2**

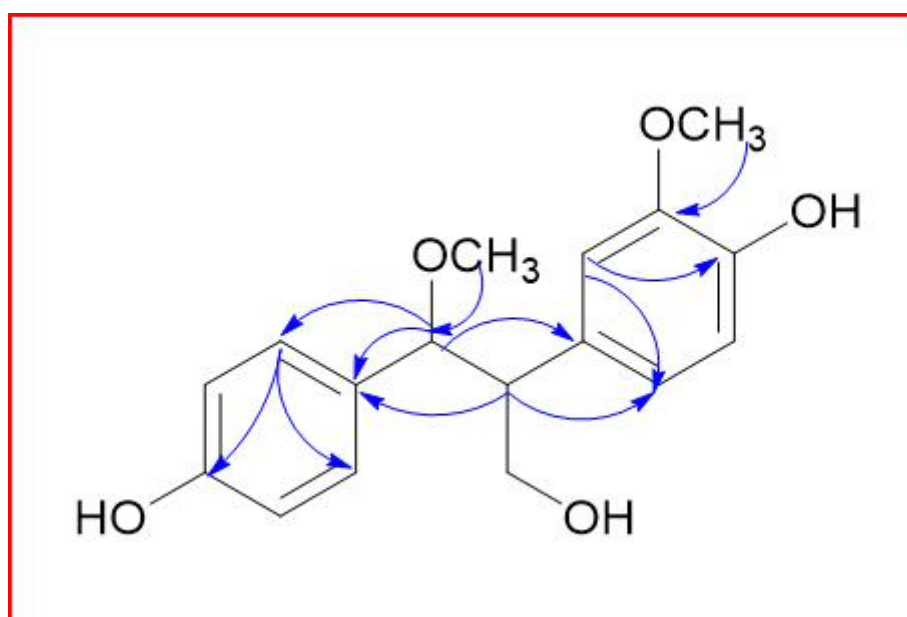

**Figure S2.8** Key HMBC correlations of compound **2**

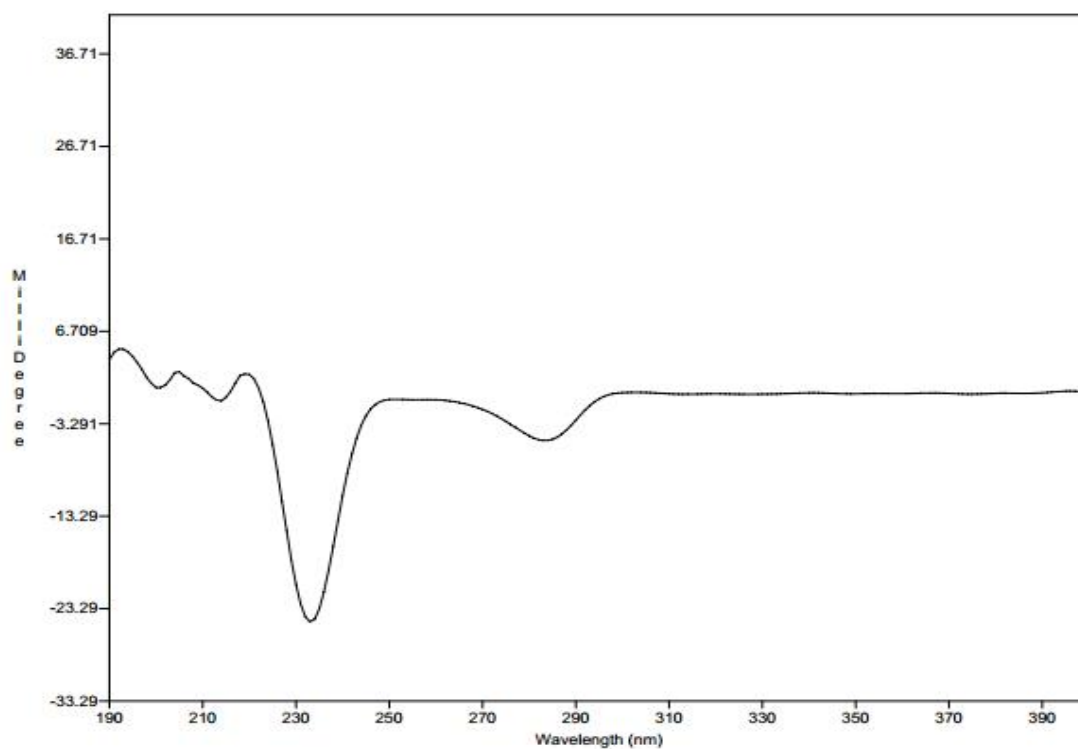

**Figure S2.9** Experimental ECD spectra of **2a**

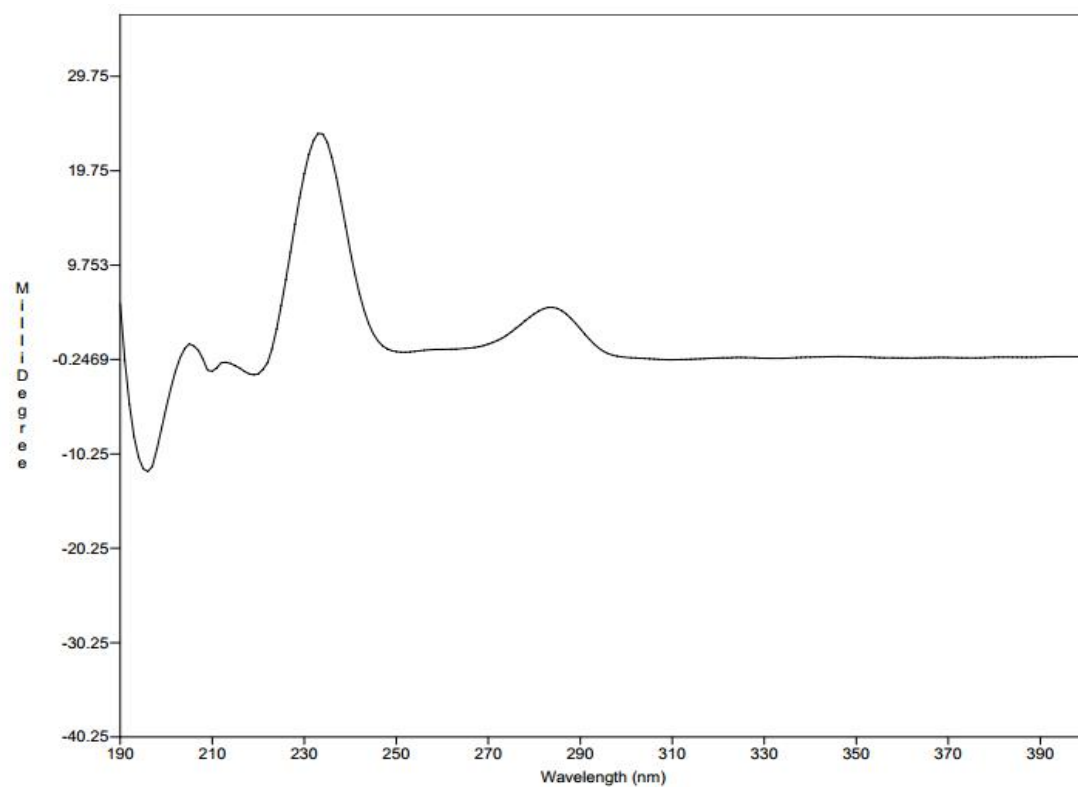

**Figure S2.10** Experimental ECD spectra of **2b**

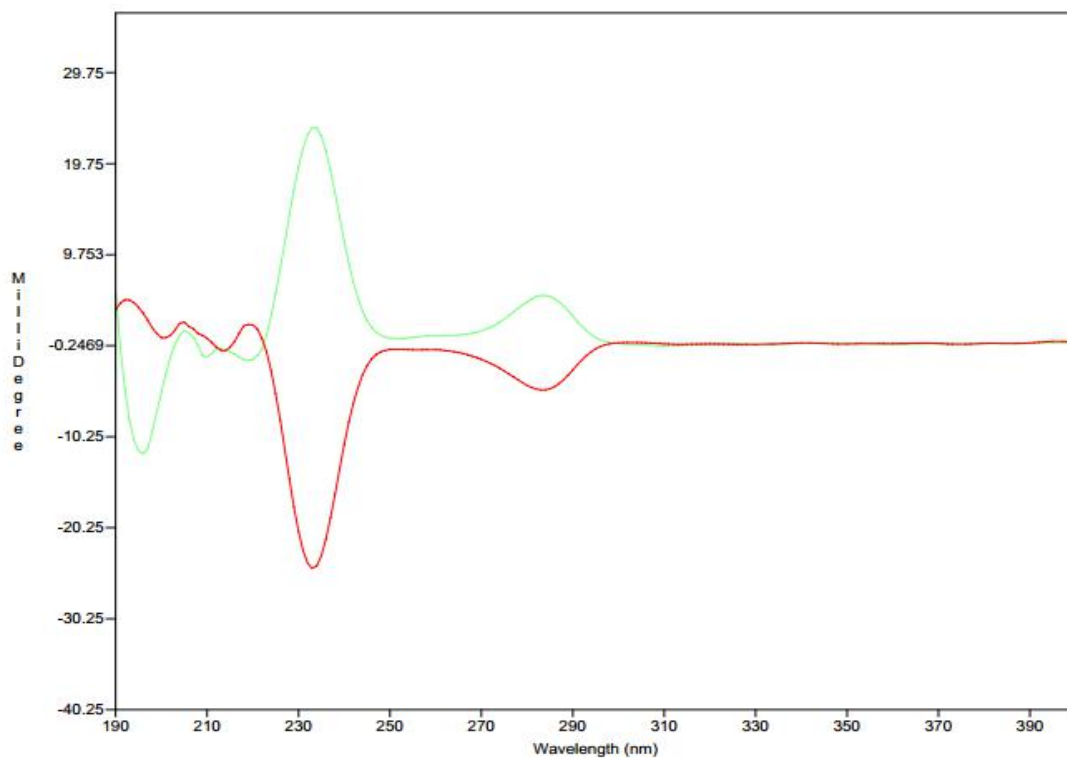

Figure S2.11 Experimental ECD spectra of 2a/2b

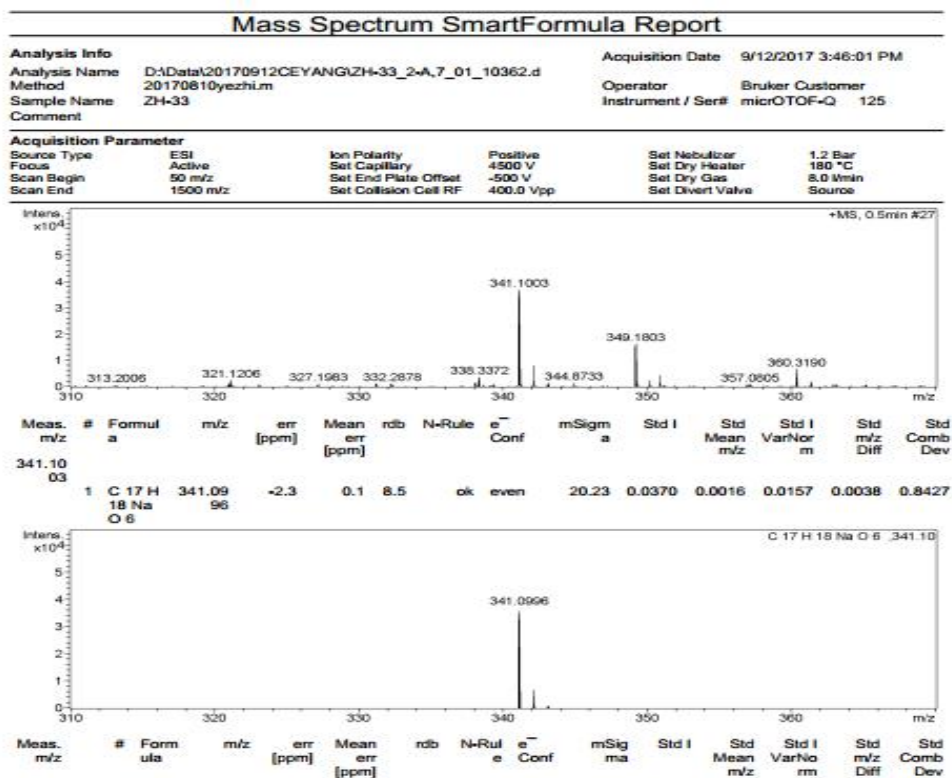

Figure S3.1 HRESIMS spectrum of compound 3

103

104

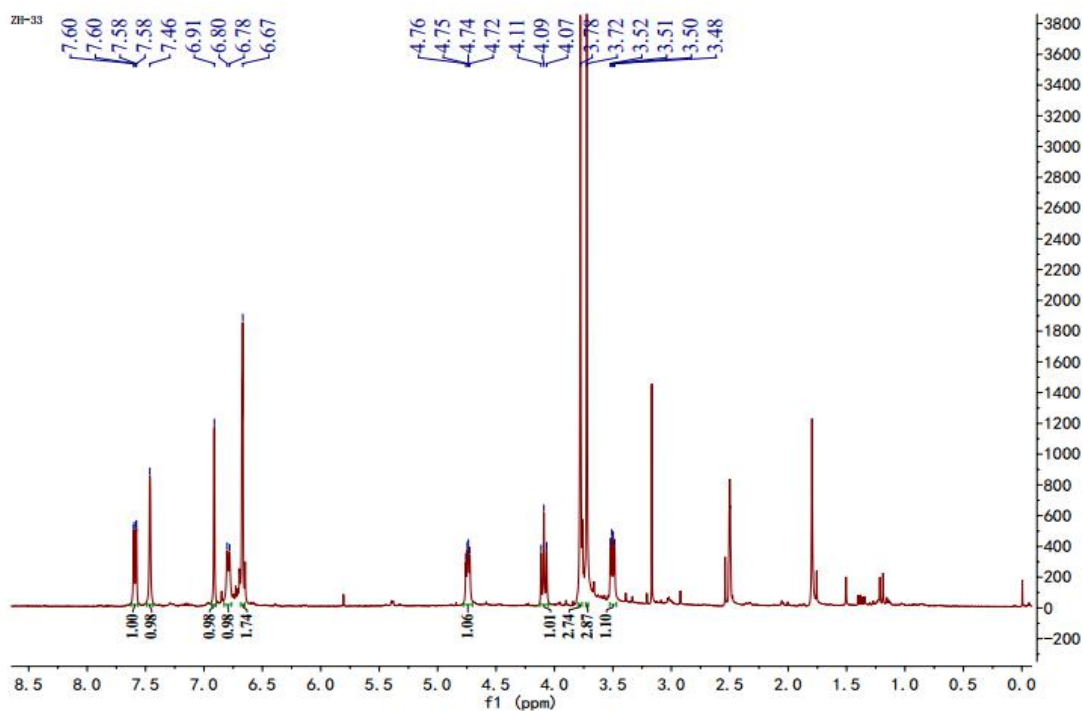

105

**Figure S3.2** <sup>1</sup>H NMR spectrum (400 MHz, DMSO-*d*<sub>6</sub>) of compound **3**

106

107

108

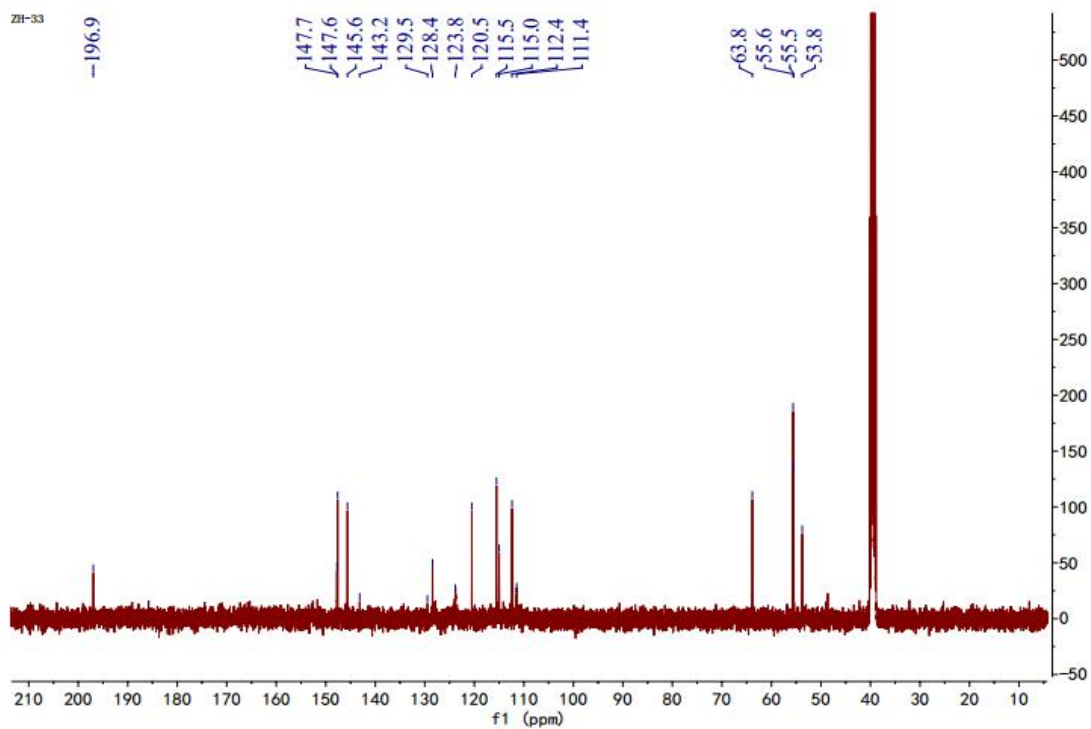

109

**Figure S3.3** <sup>13</sup>C NMR spectrum (100 MHz, DMSO-*d*<sub>6</sub>) of compound **3**

110

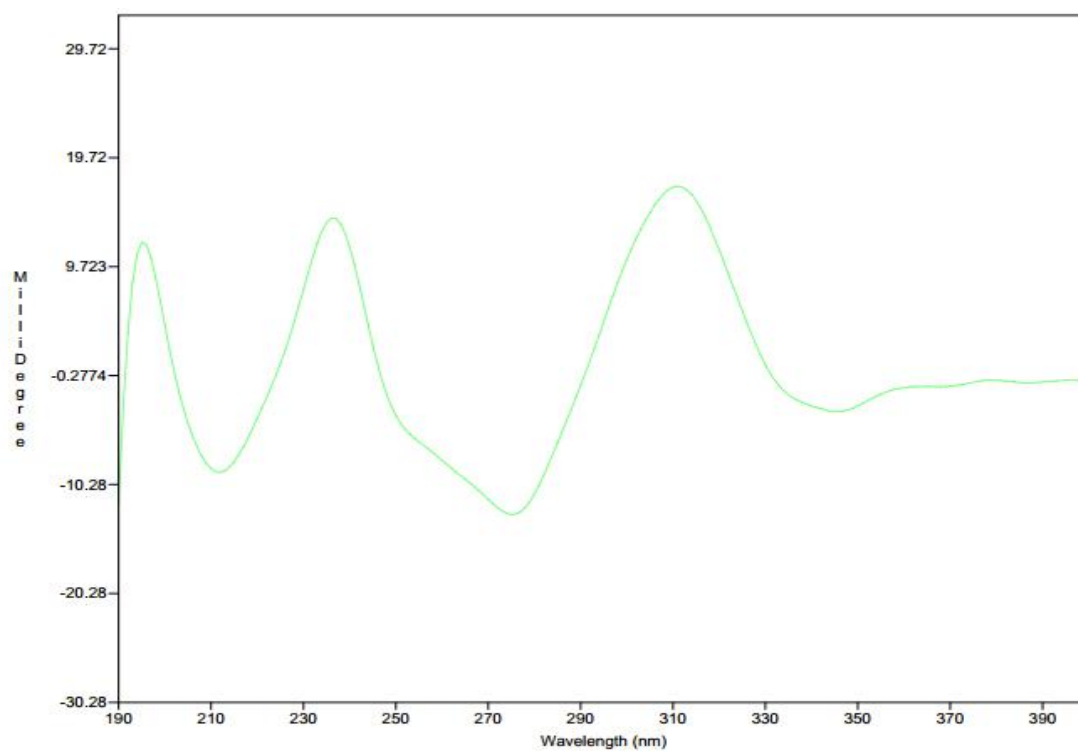

**Figure S3.4** Experimental ECD spectra of **3a**

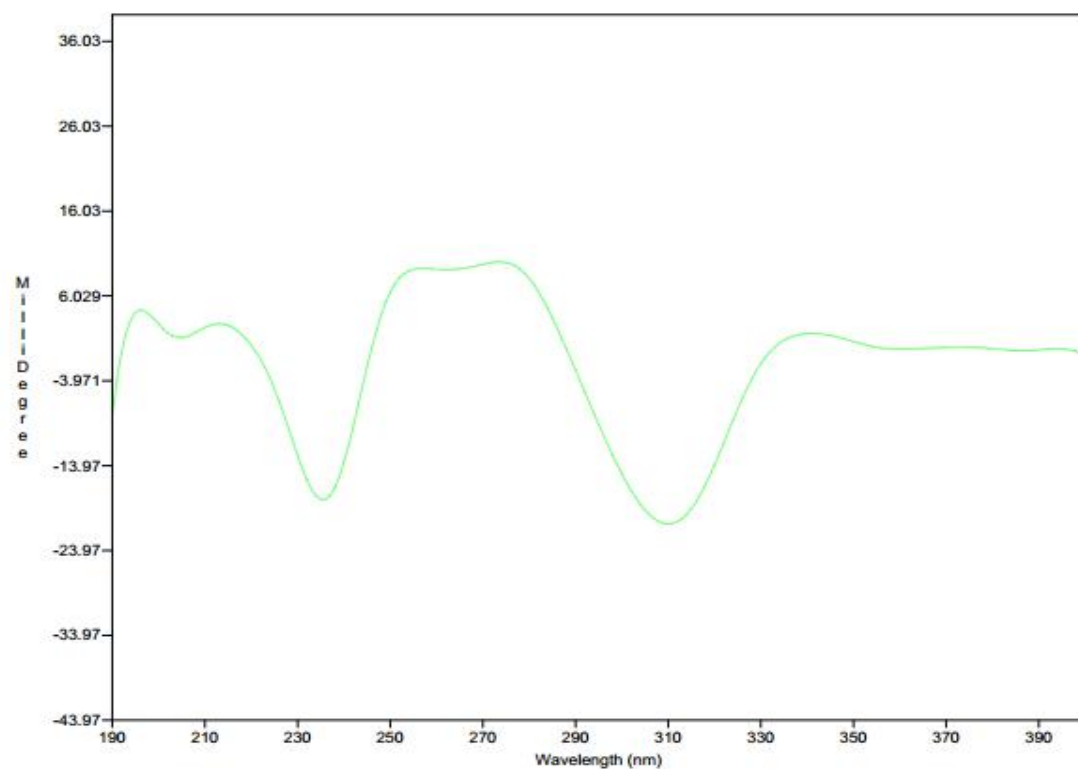

**Figure S3.5** Experimental ECD spectra of **3b**

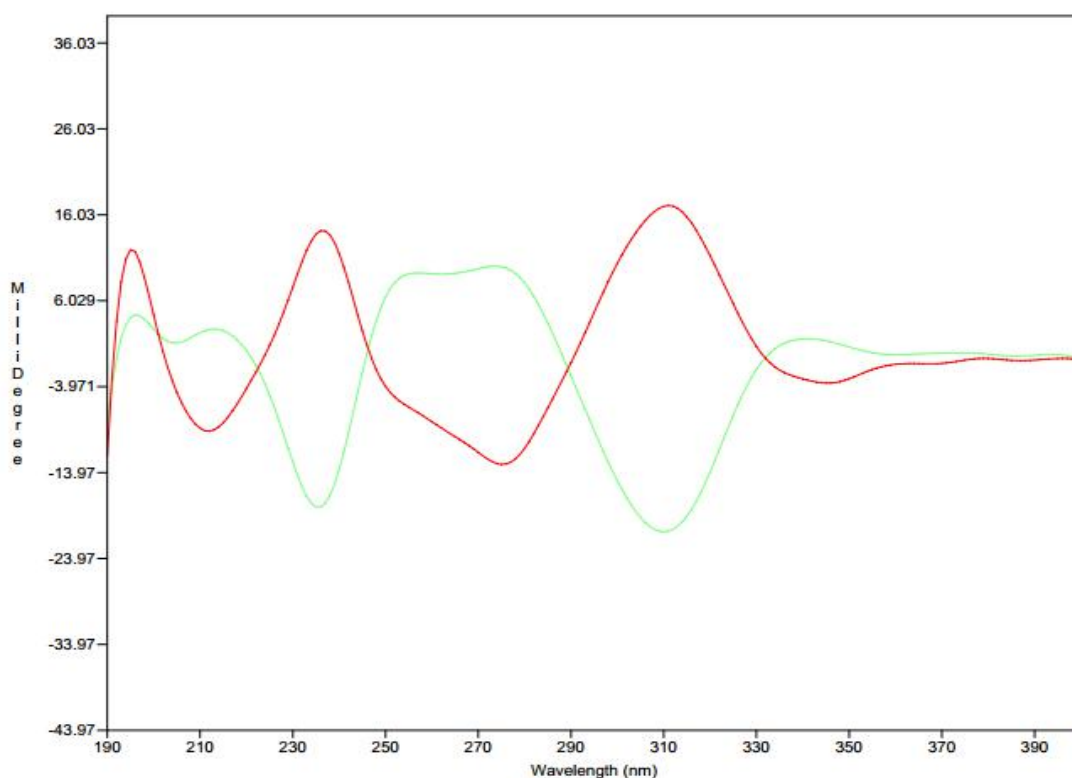

Figure S3.6 Experimental ECD spectra of 3a/3b

### Mass Spectrum SmartFormula Report

#### Analysis Info

Analysis Name D:\Data\20170330CEYANG\ZH-51\_2-C\_1\_01\_9075.d  
 Method 20170323yezhi.m  
 Sample Name ZH-51  
 Comment

Acquisition Date 3/30/2017 3:38:04 PM

Operator Bruker Customer  
 Instrument / Ser# micrOTOF-Q 125

#### Acquisition Parameter

Source Type ESI  
 Focus Active  
 Scan Begin 50 m/z  
 Scan End 1500 m/z

Ion Polarity Positive  
 Set Capillary 4500 V  
 Set End Plate Offset -500 V  
 Set Collision Cell RF 400.0 Vpp

Set Nebulizer 1.2 Bar  
 Set Dry Heater 180 °C  
 Set Dry Gas 8.0 l/min  
 Set Divert Valve Source

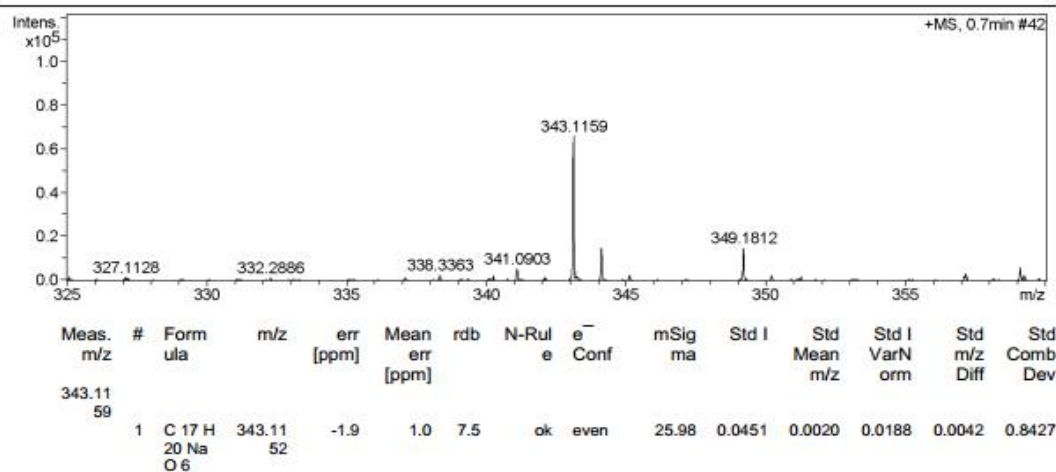

Figure S4.1 HRESIMS spectrum of compound 4



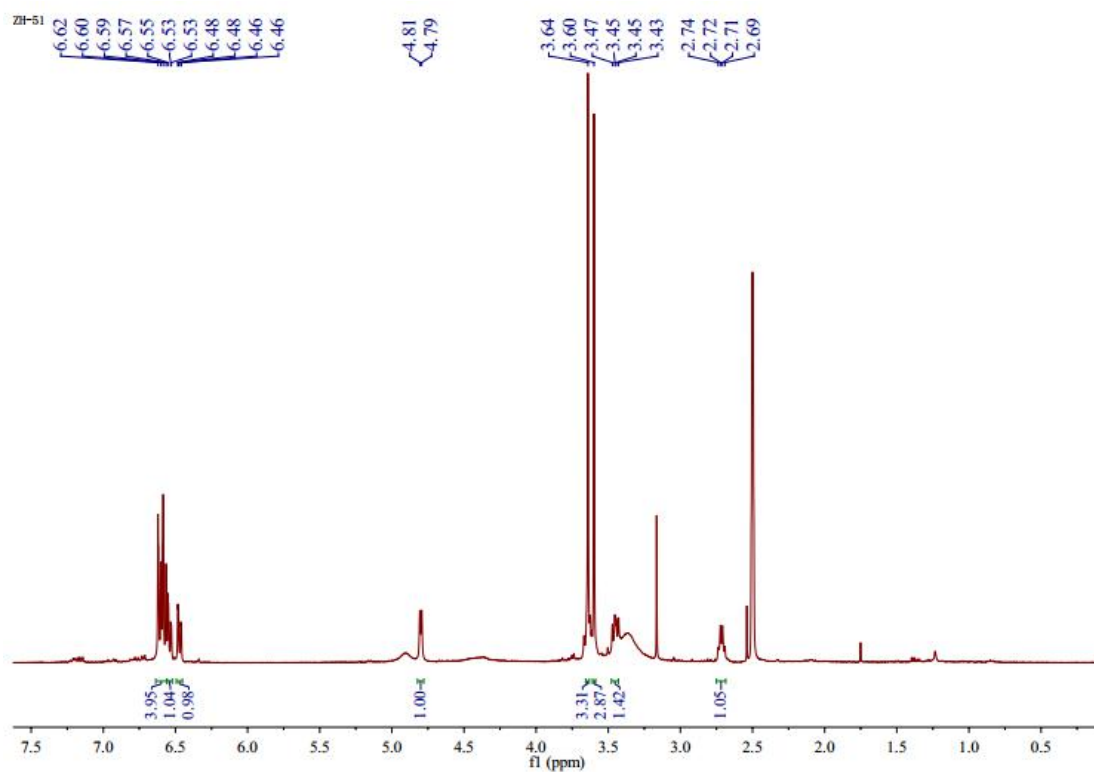

**Figure S4.2** <sup>1</sup>H NMR spectrum (400 MHz, DMSO-*d*<sub>6</sub>) of compound 4

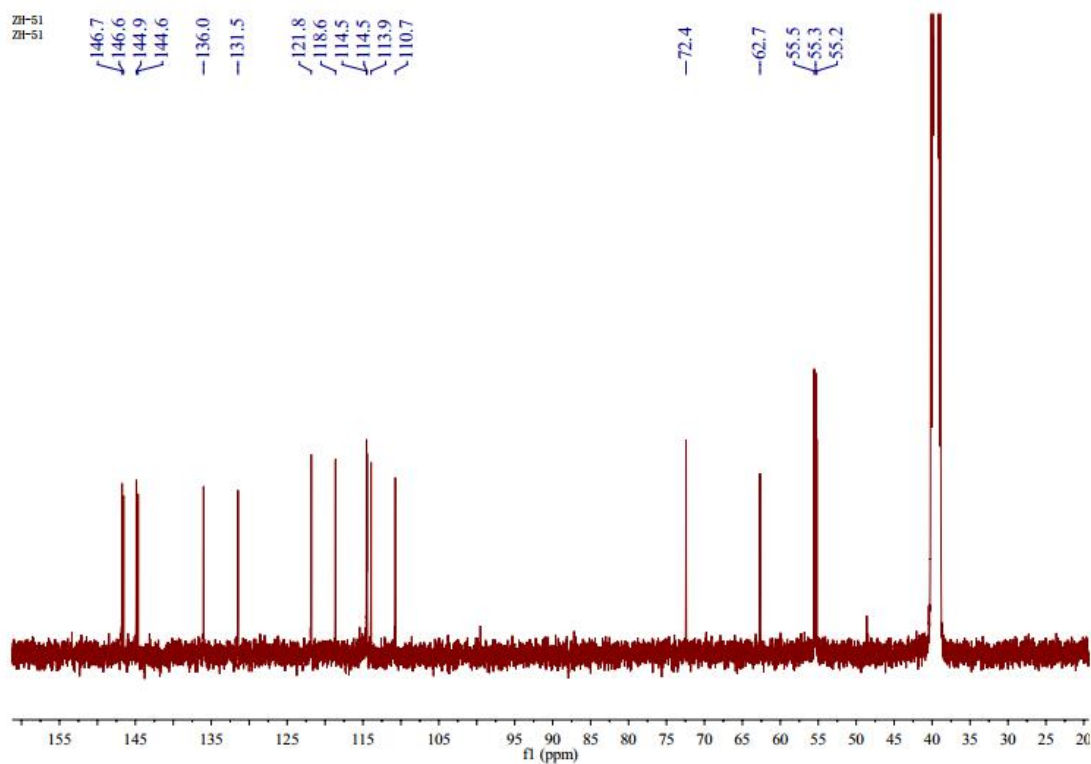

**Figure S4.3** <sup>13</sup>C NMR spectrum (100 MHz, DMSO-*d*<sub>6</sub>) of compound 4

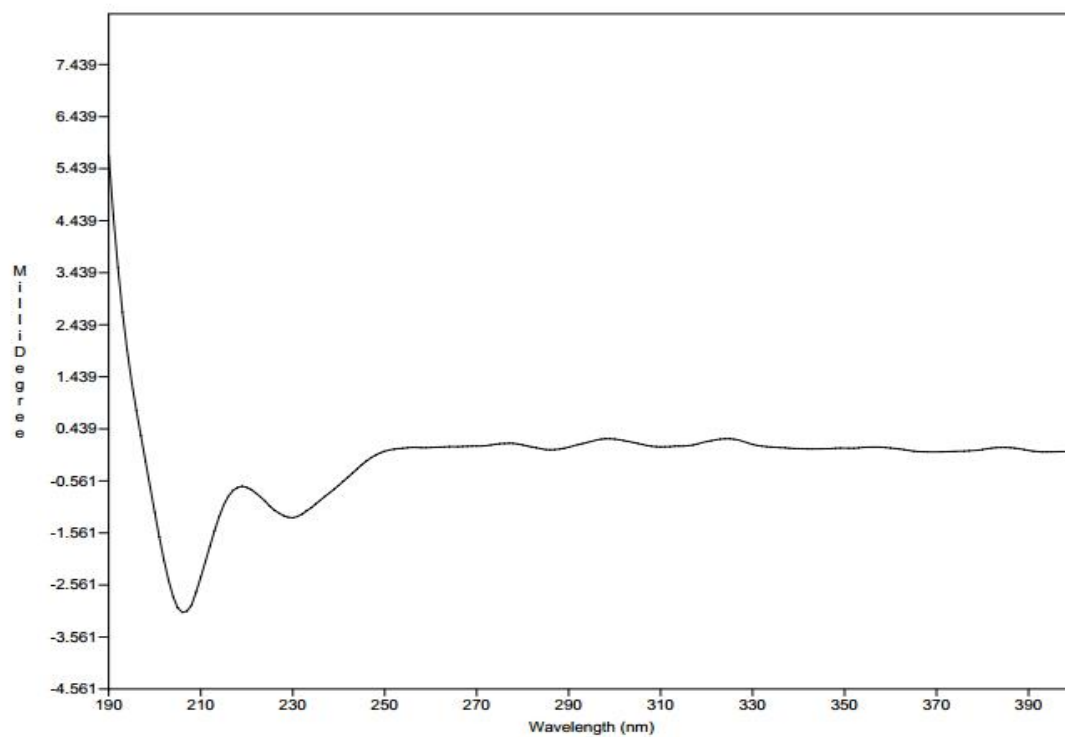

**Figure S4.4** Experimental ECD spectra of **4a**

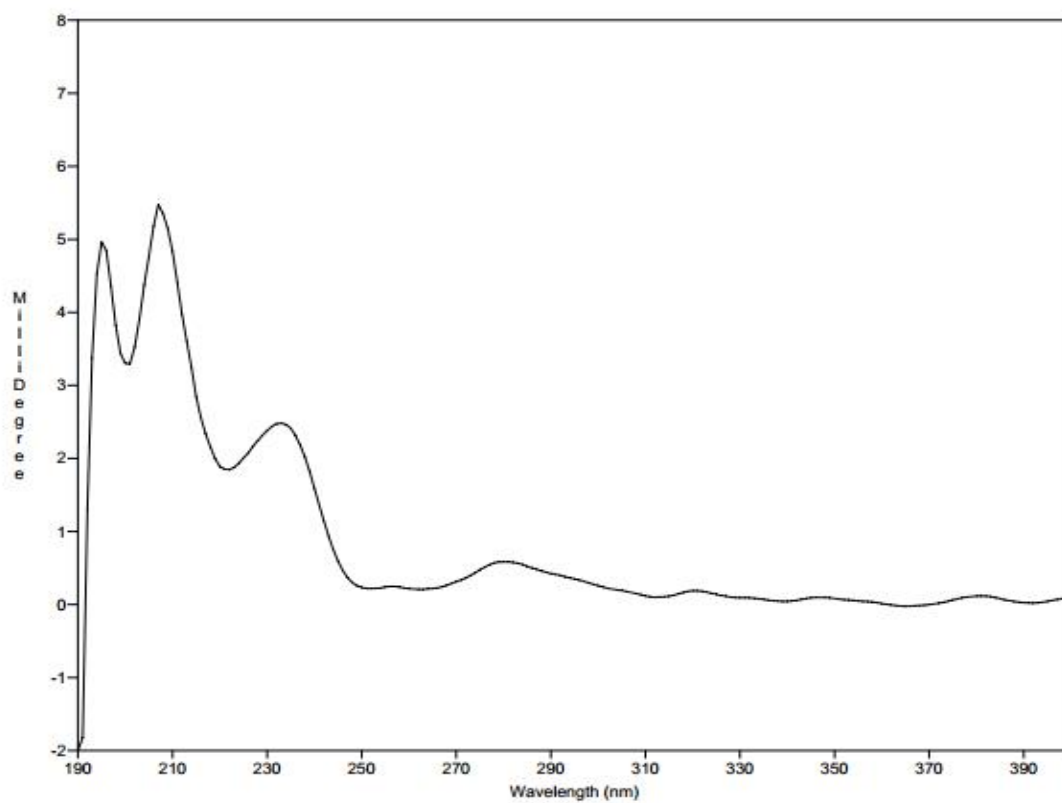

**Figure S4.5** Experimental ECD spectra of **4b**

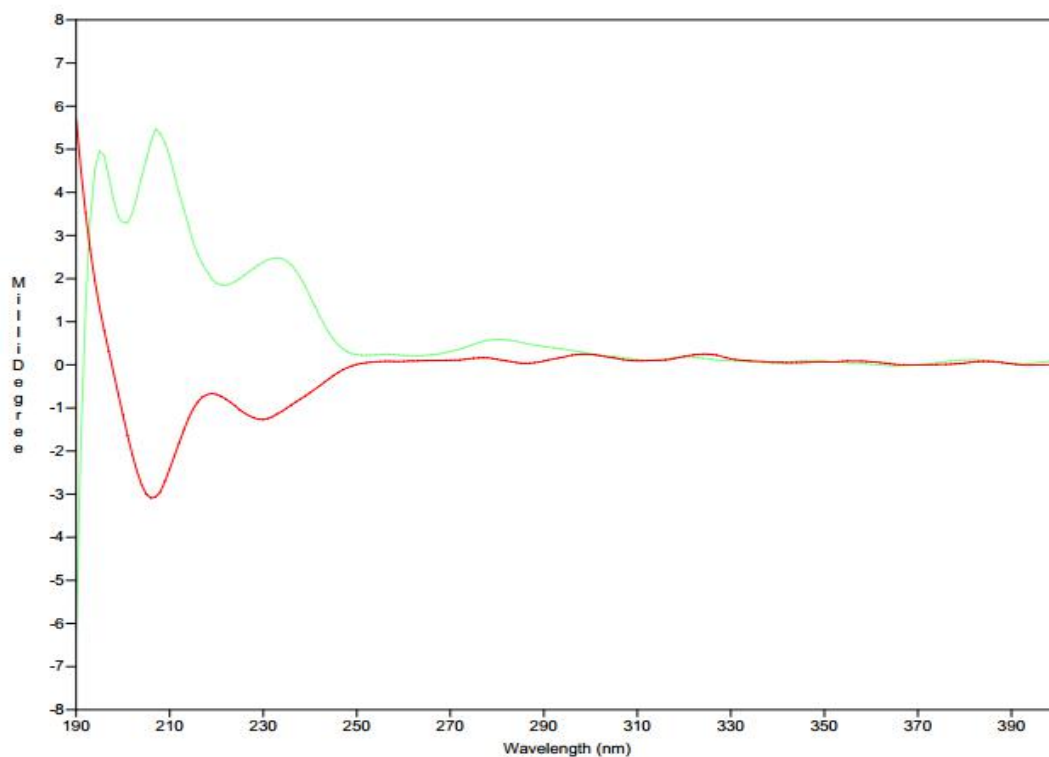

**Figure S4.6** Experimental ECD spectra of **4a/4b**

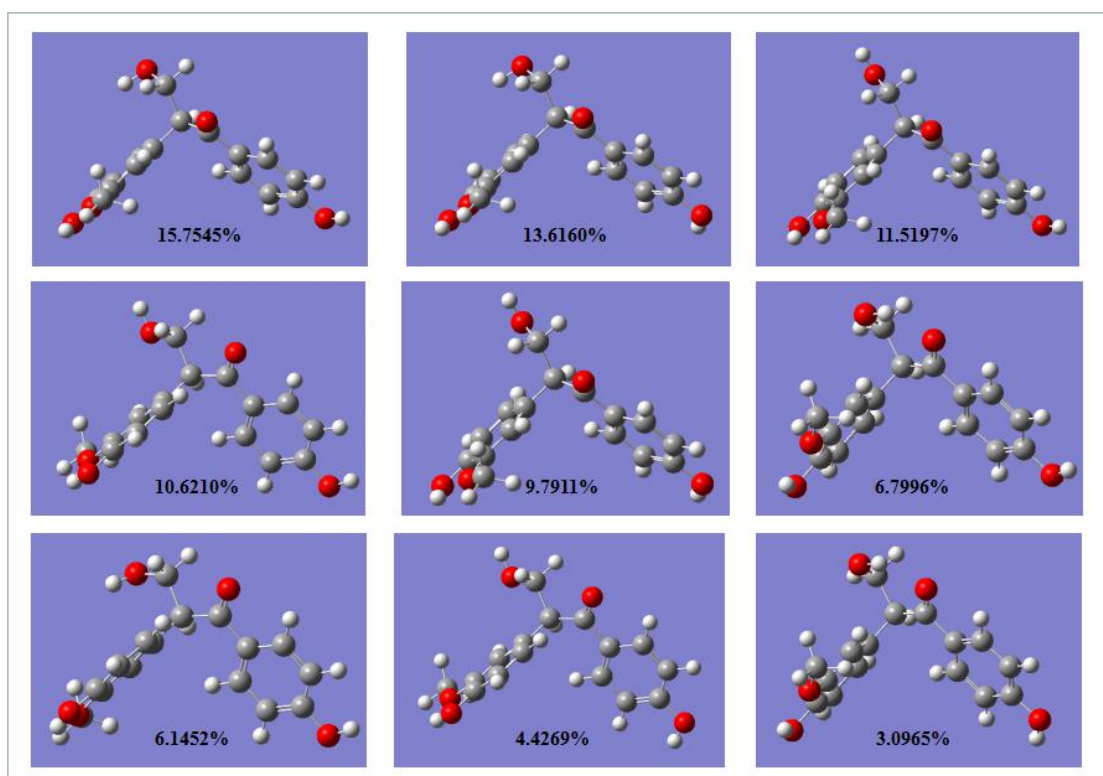

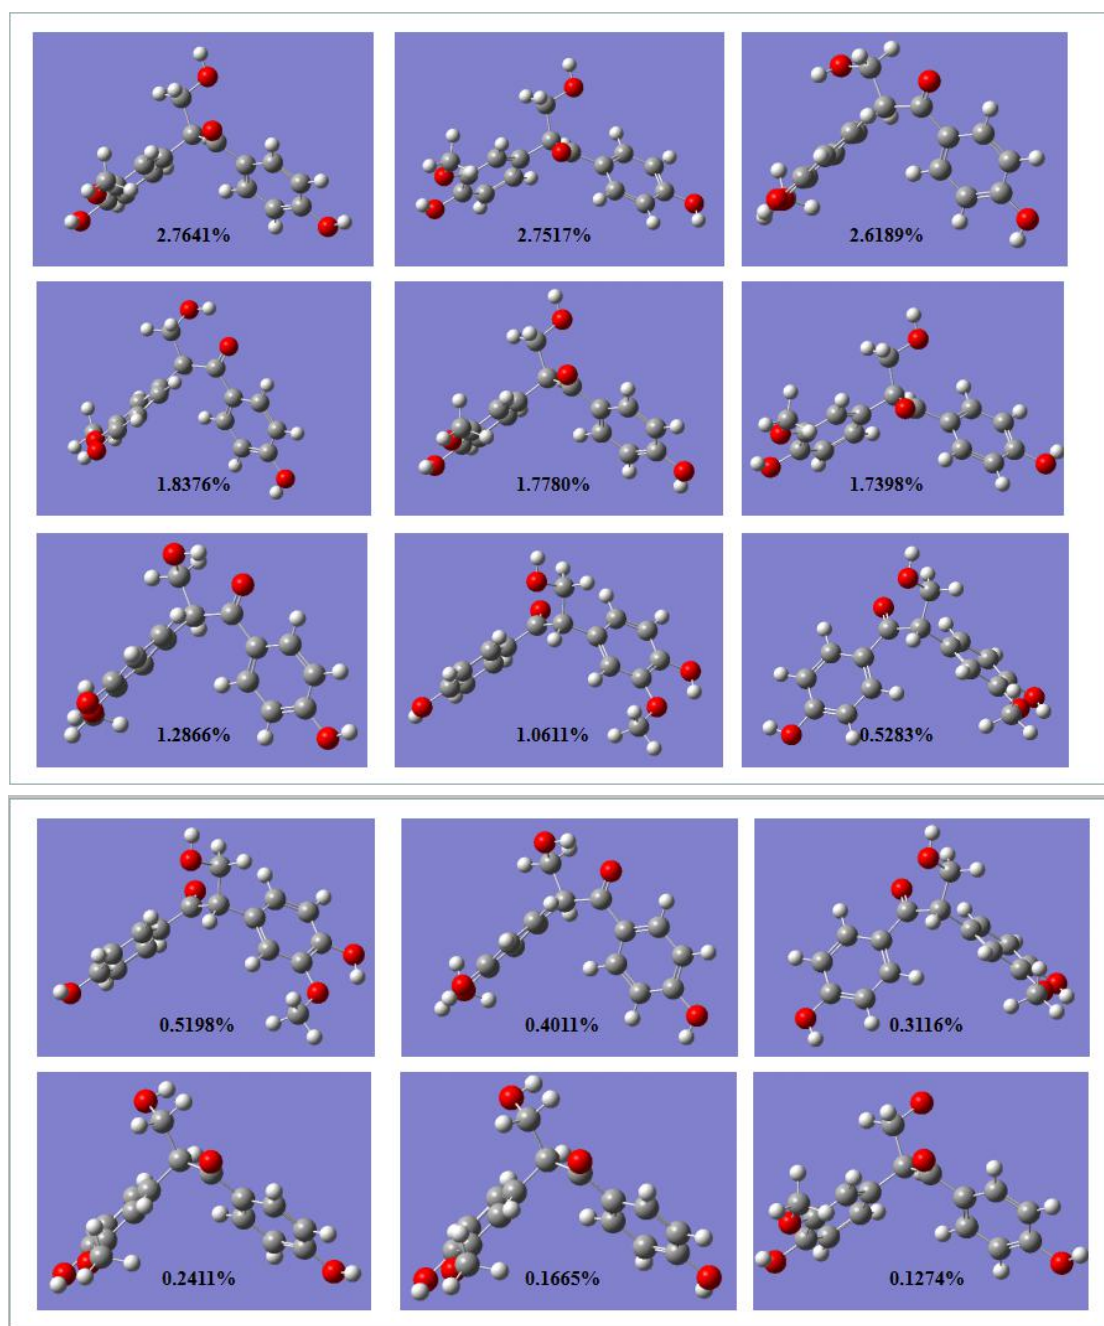

**Figure S5.** low-energy conformers and their boltzmann distribution ratios of compound **1**

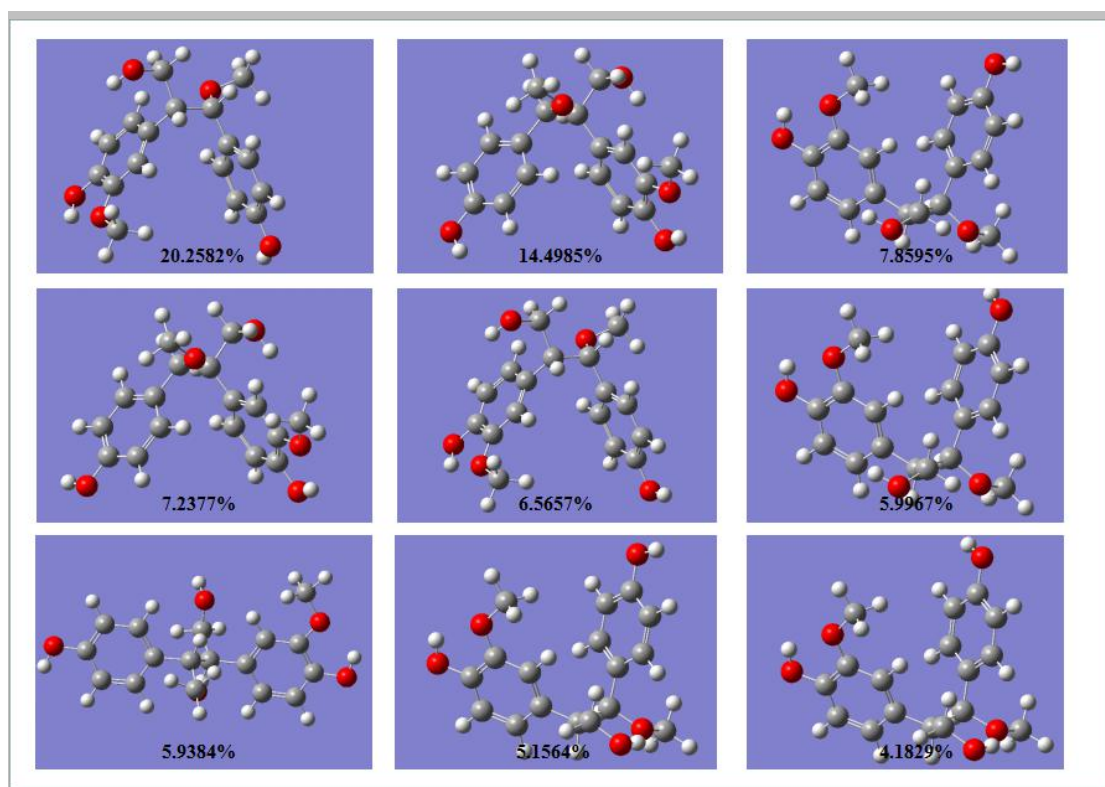

145

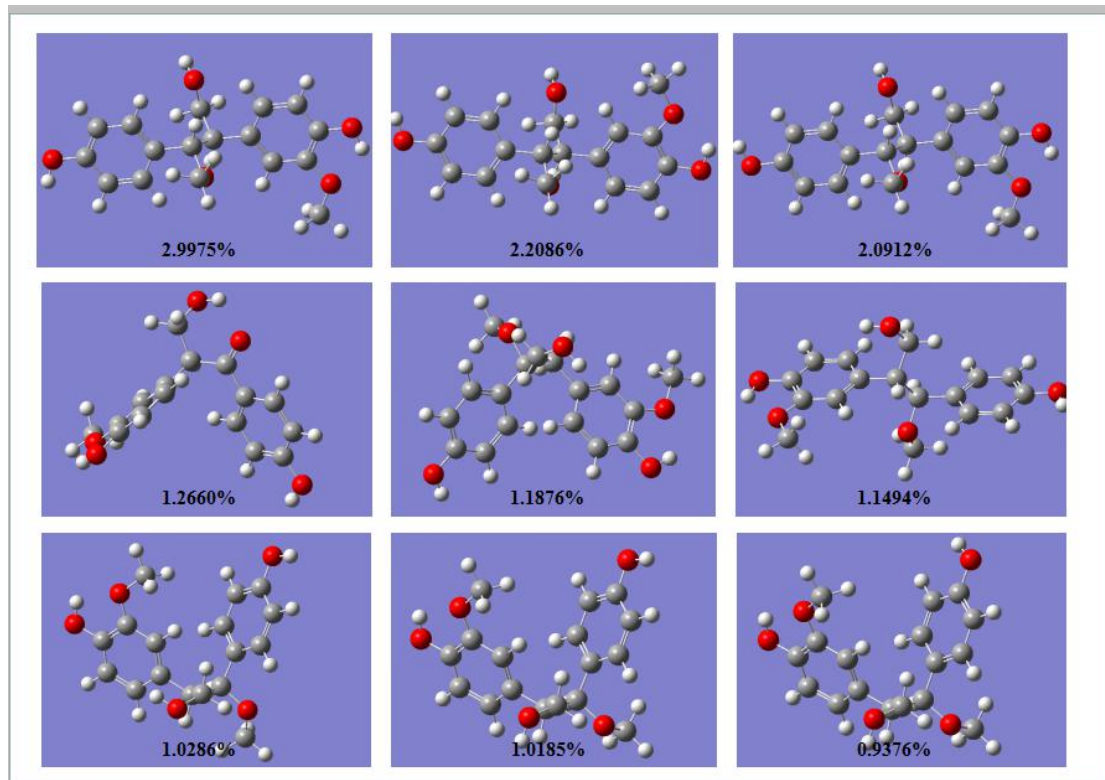

146



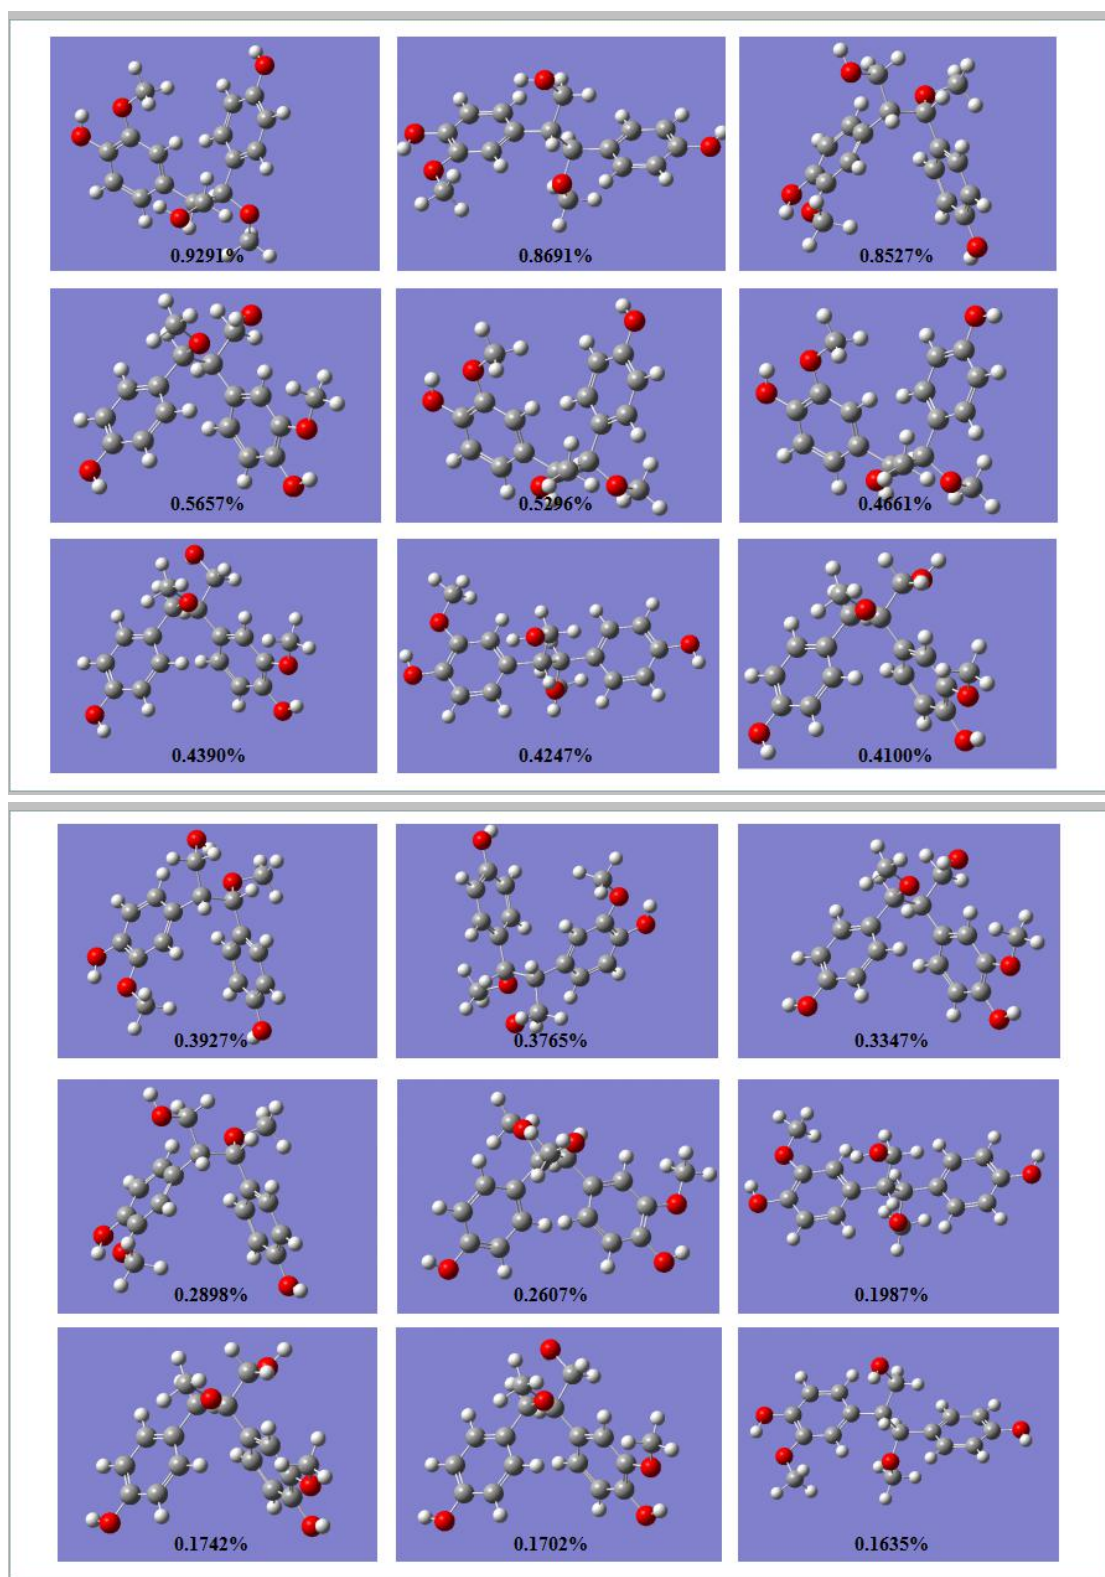

**Figure S6.** low-energy conformers and their boltzmann distribution ratios of compound **2**
